# Supplementary material
Source: PubMed Central journal article supplement (PMC8498938)
Supplement: jamaotolaryngolheadnecksurg-e212475-s001.pdf [file jamaotolaryngolheadnecksurg-e212475-s001.pdf]

## Supplemental Online Content

Lončar I, Noltes ME, Dickhoff C, et al. Persistent postthyroidectomy hypoparathyroidism in the Netherlands. *JAMA Otolaryngol Head Neck Surg*. Published online October 7, 2021. doi:10.1001/jamaoto.2021.2475

**eTable.** Overview of the calcium supplementation protocol per hospital

This supplemental material has been provided by the authors to give readers additional information about their work.

**eTable. Overview of the calcium supplementation protocol per hospital.**

| <b>eTable 1.</b> Overview of the calcium supplementation protocol per hospital.                                                                                                                                                   |                               |                                      |                                         |                                         |                                  |                     |                   |                      |
|-----------------------------------------------------------------------------------------------------------------------------------------------------------------------------------------------------------------------------------|-------------------------------|--------------------------------------|-----------------------------------------|-----------------------------------------|----------------------------------|---------------------|-------------------|----------------------|
| Hospital                                                                                                                                                                                                                          | Calcium treatment initiated * | Calcium supplements and dosage       | Active vitamin D treatment initiated ** | Active vitamin D dosage ***             | IV treatment initiated ****      | IV treatment dosage | Weaning initiated | Target serum calcium |
| 1                                                                                                                                                                                                                                 | Ca <2.1 / symptoms            | 3 times daily 1g calciumcarbonate    | POD 1 Ca <2.2                           | Start 1 time daily 0.5ug                | Ca <2.0                          | Bolus 1g            | Ca >2.2           | Ca 2.2               |
| 2                                                                                                                                                                                                                                 | Ca <2.2                       | 2 times daily 1g calciumcarbonate    | Ca <2.0                                 | Start 1 time daily 1ug                  | Ca <1.9 or severe symptomatology | Bolus 1g            | NA                | Ca 2.1-2.2           |
| 3                                                                                                                                                                                                                                 | Prophylactic                  | 2 times daily 1g calcium/ 400IE D3   | Prophylactic                            | 1 time daily 1ug (stopped at discharge) | Ca <1.8 or severe symptomatology | Bolus 1g            | Normocalcemia     | Lower normal range   |
| 4                                                                                                                                                                                                                                 | Ca <2.2                       | 3 times daily 500mg calciumcarbonate | Ca <2.0                                 | Start 1 time daily 1ug                  | Ca <1.9                          | 3 times daily 1g    | NA                | NA                   |
| 5                                                                                                                                                                                                                                 | Ca <2.1                       | 2-3 times daily 1g calciumcarbonate  | Ca <2.1                                 | Start 2-3 times daily 0.5ug             | Ca <1.9                          | Bolus 1-2g          | Ca >2.2           | Ca 2.1-2.2           |
| 6                                                                                                                                                                                                                                 | Ca <2.2                       | 3 times daily 1g calciumcarbonate    | Ca <2.0                                 | Start 1 times daily 1ug                 | Ca <1.9                          | 3 times daily 1g    | NA                | Ca >2.0              |
| 7                                                                                                                                                                                                                                 | Ca <2.2                       | 3 times daily 1g carbonate           | Ca <2.0                                 | Start 1 time daily 1ug                  | Ca <1.9                          | 3 times daily 1g    | NA                | Ca >2.0              |
| *Serum calcium in mmol/L adjusted for albumin<br>** active vitamin D or active vitamin D analogues<br>*** Starting dosage of active vitamin D<br>**** Intravenous (IV) treatment with calciumgluconate<br>POD = postoperative day |                               |                                      |                                         |                                         |                                  |                     |                   |                      |
